# Supplementary material
Source: publisher site journal article supplement (https://www.dovepress.com/article/493171)
Supplement: Supplementary file 1 [file get_supplementary_file.php]

**Supplementary Table 1. Molecular Names.**

| **Antibody Name** | **Dilution Ratio** | **Catalog Number** | **Brand** |
| --- | --- | --- | --- |
| GAPDH | 1: 2000 | ab34710 | Abcam |
| Collagen1a1 (Col1a1) | 1: 2000 | ab34710 | Abcam |
| Fibronectin (Fn) | 1: 2000 | ab2413 | Abcam |
| Sftpa1 | 1: 2000 | ab190087 | Abcam |
| Sftpc | 1: 2000 | ab270521 | Abcam |
| HIF-1α | 1: 2000 | ab1 | Abcam |
| p-IRE1α | 1: 2000 | ab243665 | Abcam |
| ATF6 | 1: 2000 | ab37149 | Abcam |
| IGF1 | 1: 2000 | ab133542 | Abcam |
| p21 | 1: 2000 | ab107099 | Abcam |
| p16 | 1: 2000 | ab151303 | Abcam |
| p38 | 1: 2000 | ab316937 | Abcam |
| p-p38 | 1: 2000 | ab178867 | Abcam |
| ERK1/2 | 1: 2000 | ab17942 | Abcam |
| p-ERK1/2 | 1: 2000 | ab201015 | Abcam |
| IL-6 | 1: 2000 | ab6672 | Abcam |
| IL-1β | 1: 2000 | ab216995 | Abcam |
| TNF-α | 1: 2000 | ab183218 | Abcam |

**Supplementary Table 2. mRNA Sequences.**

| **Gene** | **Species** | **Forward (5′-3′)** | **Reverse (5′-3′)** |
| --- | --- | --- | --- |
| GAPDH | Human | GGAGCGAGATCCCTCCAAAAT | GGCTGTTGTCATACTTCTCATGG |
| CHEK2 | Human | GAGAGTGTGCGGCTCCAG | GACTGTGAGGAGGAGCCTTG |
| Collagen1a1 | Human | CGAGGCTCTGAAGGTCCCC | CCAGGAGCACCATTGGCA |
| Fibronectin | Human | AAGAAGGGCTCGTGTGACAG | TCTTGTCCTACATTCGGCGG |
| Sftpc | Human | GCTACAGCCTAAGGGCAACA | GGGATCACACCTGCTCACC |
| Sftpa1 | Human | ACTTGGAGGCAGAGACCCAA | GGCTTCCAACACAAACGTCC |
| ATF6 | Human | TGGAAGCCTAAAGAGGACCTG | CGTGGGAGGACAGAGAAACAA |
| p-IRE1α | Human | AAAACTACGCCTCCCCTGTG | GTCAGATAGCGCAGGGTCTC |

**Supplementary Table 3. Molecular Docking:** MMP7, ESR2, IGF1, DAO, MMP13, MMP16, AKR1B10 and VEGFA.

| **Target** | **Binding Site** | **Affinity(kcal/mol)** | **Estimated Ki** | **Ki Units** | **Ligand Efficiency** |
| --- | --- | --- | --- | --- | --- |
| MMP7 | 2 | -7.3 | 4.46 | uM | -0.35 |
| 8 | -7.3 | 4.46 | Um | -0.35 |
| 3 | -7.2 | 5.28 | uM | -0.34 |
| 5 | -7.2 | 5.28 | uM | -0.34 |
| 1 | -7.1 | 6.25 | uM | -0.34 |
| 7 | -7.1 | 6.25 | uM | -0.34 |
| 9 | -6.2 | 28.53 | uM | -0.30 |
| 10 | -6.1 | 33.78 | uM | -0.29 |
| 4 | -5.4 | 0.11 | mM | -0.26 |
| 6 | -5.4 | 0.11 | mM | -0.26 |
| ESR2 | 3 | -7.1 | 6.25 | uM | -0.34 |
| 5 | -7.0 | 7.40 | uM | -0.33 |
| 7 | -7.0 | 7.40 | uM | -0.33 |
| 8 | -6.9 | 8.76 | uM | -0.33 |
| 1 | -6.8 | 10.37 | uM | -0.32 |
| 2 | -6.8 | 10.37 | uM | -0.32 |
| 4 | -6.4 | 20.36 | uM | -0.30 |
| 6 | -6.4 | 20.36 | uM | -0.30 |
| 9 | -5.9 | 47.35 | uM | -0.28 |
| 10 | -5.9 | 47.35 | uM | -0.28 |
| IGF1 | 1 | -5.4 | 0.11 | mM | -0.26 |
| 7 | -5.2 | 0.15 | mM | -0.25 |
| 4 | -5.0 | 0.22 | mM | -0.24 |
| 2 | -4.9 | 0.26 | mM | -0.23 |
| 3 | -4.9 | 0.26 | mM | -0.23 |
| 5 | -4.9 | 0.26 | mM | -0.23 |
| 6 | -4.9 | 0.26 | mM | -0.23 |
| 8 | -4.8 | 0.30 | mM | -0.23 |
| 9 | -4.8 | 0.30 | mM | -0.23 |
| DAO | 4 | -8.5 | 588.12 | nM | -0.40 |
| 5 | -8.5 | 588.12 | nM | -0.40 |
| 6 | -8.5 | 588.12 | nM | -0.40 |
| 8 | -8.5 | 588.12 | nM | -0.40 |
| 1 | -7.7 | 2.27 | uM | -0.37 |
| 2 | -7.7 | 2.27 | uM | -0.37 |
| 3 | -7.7 | 2.27 | uM | -0.37 |
| 7 | -7.7 | 2.27 | uM | -0.37 |
| 9 | -7.7 | 2.27 | uM | -0.37 |
| 10 | -6.5 | 17.20 | uM | -0.31 |
| MMP13 | 3 | -8.6 | 496.78 | nM | -0.41 |
| 1 | -8.5 | 588.12 | nM | -0.40 |
| 2 | -8.5 | 588.12 | nM | -0.40 |
| 7 | -8.5 | 588.12 | nM | -0.40 |
| 5 | -8.2 | 975.81 | nM | -0.39 |
| 6 | -8.2 | 975.81 | nM | -0.39 |
| 8 | -8.2 | 975.81 | nM | -0.39 |
| 9 | -8.0 | 1.37 | uM | -0.38 |
| 4 | -7.7 | 2.27 | uM | -0.37 |
| 10 | -7.6 | 2.69 | uM | -0.36 |
| MMP16 | 2 | -8.6 | 496.78 | nM | -0.41 |
| 3 | -8.6 | 496.78 | nM | -0.41 |
| 4 | -8.6 | 496.78 | nM | -0.41 |
| 1 | -8.5 | 588.12 | nM | -0.40 |
| 5 | -7.0 | 7.40 | uM | -0.33 |
| 6 | -7.0 | 7.40 | uM | -0.33 |
| 10 | -6.4 | 20.36 | uM | -0.30 |
| 7 | -6.2 | 28.53 | uM | -0.30 |
| 8 | -6.2 | 28.53 | uM | -0.30 |
| 9 | -6.2 | 28.53 | uM | -0.30 |
| AKR1B10 | 6 | -9.0 | 252.91 | nM | -0.43 |
| 1 | -8.9 | 299.41 | nM | -0.42 |
| 2 | -8.9 | 299.41 | nM | -0.42 |
| 3 | -8.9 | 299.41 | nM | -0.42 |
| 4 | -8.9 | 299.41 | nM | -0.42 |
| 8 | -6.6 | 14.53 | uM | -0.31 |
| 9 | -6.3 | 24.10 | uM | -0.30 |
| 5 | -6.2 | 28.53 | uM | -0.30 |
| 7 | -6.2 | 28.53 | uM | -0.30 |
| 10 | -5.6 | 78.56 | uM | -0.27 |
| VEGFA | 1 | -6.6 | 14.53 | uM | -0.31 |
| 2 | -6.6 | 14.53 | uM | -0.31 |
| 4 | -6.6 | 14.53 | uM | -0.31 |
| 5 | -6.6 | 14.53 | uM | -0.31 |
| 6 | -6.6 | 14.53 | uM | -0.31 |
| 8 | -6.6 | 14.53 | uM | -0.31 |
| 10 | -6.6 | 14.53 | uM | -0.31 |
| 7 | -6.5 | 17.20 | uM | -0.31 |
| 9 | -6.5 | 17.20 | uM | -0.31 |
| 3 | -6.4 | 20.36 | uM | -0.30 |
